# Supplementary material
Source: PubMed Central journal article supplement (PMC1569182)
Supplement: pnas_0605926103_1.pdf [file pnas_0605926103_1.pdf]

Gsb-Dm 1 ---MAVSALNMT~~PY~~FGG-~~Y~~PFO-----GQGRVNQLGGVF INGRPLPNHIRRQIV  
Gsb Neuro-Dm 1 ---MDMSSANS~~LR~~PLFAG-~~Y~~PFO-----GQGRVNQLGGVF INGRPLPNHIRLKIIV  
PAX3-Hs 1 MTTLAGAVPRMMPGPGQNYPRSGFPLEVSTPLGQGRVNQLGGVF INGRPLPNHIRHKIV  
PAX7-Hs 1 MAALPGITVPRMMPAPGQNYPRTGFPLEVSTPLGQGRVNQLGGVF INGRPLPNHIRHKIV

Gsb-Dm 46 EMAAAGVRPCVISRQLRVSHGCVSKILNRFQETGSIRPGVIGGSKPR-VATPDIESRIEE  
Gsb Neuro-Dm 47 EMAASGVRPCVISRQLRVSHGCVSKILNRYQETGSIRPGVIGGSKPK-VTSPEIETRIDE  
PAX3-Hs 61 EMAAHGIRPCVISRQLRVSHGCVSKILCRYQETGSIRPGAIGGSKPKQVTTTPDVEKKIEE  
PAX7-Hs 61 EMAAHGIRPCVISRQLRVSHGCVSKILCRYQETGSIRPGAIGGSKPRQVATPDVEKKIEE

Gsb-Dm 105 LKQSQPGIFSWEIRAKLIEAGVCDKQNA~~PS~~--VSSISRLLRGSSGSGTS-----  
Gsb Neuro-Dm 106 LRKENPSIFSWEIREKLIKEGFADP---PS--TSSISRLLRGSDRGSE~~DG~~-----  
PAX3-Hs 121 YKRENP~~GM~~F~~S~~WEIRD~~KL~~LKDAVCDRNTVPS--VSSISRLR~~SK~~FGKGE~~EE~~EADLERKEAE  
PAX7-Hs 121 YKRENP~~GM~~F~~S~~WEIRD~~LL~~LKDGHC~~DR~~STVPSGLVSSISRVLR~~IK~~FGKKE~~EE~~--DEADK~~KED~~

Gsb-Dm 153 -----HSIDGILGGAGSVGSEDESEDDAEP~~SV~~QLK~~RK~~QRRSRTT~~TF~~SNDQIDALERTF  
Gsb Neuro-Dm 151 ----RKDY~~TI~~NGILGGRDS----DISDTESEPGIPLK~~RK~~QRRSRTT~~TF~~TAEQLEALERAF  
PAX3-Hs 179 ESEKKAKHSIDGILSERASAPQSD~~EG~~S~~D~~IDSE~~PD~~LPLK~~RK~~QRRSRTT~~TF~~TAEQLEELERAF  
PAX7-Hs 179 DGEKKAKHSIDGILGDKGNR--LDEGSDVESE~~PD~~LPLK~~RK~~QRRSRTT~~TF~~TAEQLEELERAF

Gsb-Dm 205 ARTQYPDVYTREELAQSTGLTEARVQVWFSNRRARL~~RK~~QLN-----TQQVPSFA  
Gsb Neuro-Dm 202 SRTQYPDVYTREELAQTITALTEARIQVWFSNRRARL~~RK~~HS~~GG~~-----SNSGLSPMN  
PAX3-Hs 239 ERTHYPDIYTREELAQR~~AK~~LTEARVQVWFSNRRAR~~WR~~KQAGANQLMAFNHLIPGGFPPTA  
PAX7-Hs 237 ERTHYPDIYTREELAQR~~TK~~LTEARVQVWFSNRRAR~~WR~~KQAGANQLAAFNHLIPGGFPPTG

Gsb-Dm 254 PTSTSF~~GAT~~PTTSAAPAPNMG-----MSLYSSQSWPSSGAYENHAAYGCSVASMSPASS  
Gsb Neuro-Dm 253 SGSSNVGVVGLSGATAPLGYG~~PL~~G-VGSMAGYSPAPGTTATGAGMNDGVHHAHAPSSH  
PAX3-Hs 299 MPTLPT~~Y~~QLSETSYQPT~~S~~IPQAVSDPSSIVHRPQPLPPSTVHQSTIPSNPDSSSAYCLPS  
PAX7-Hs 297 MPTLPPYQLPDSTYPTTTISODGG--SIVHRPQPLPPSTMHQGLAAAAAADTSSAYG

Gsb-Dm 308 TSGTSSAAHSPVQIQAQ-----  
Gsb Neuro-Dm 312 HSAATAAAAAHHHTQMGGYDLVQSAA--  
PAX3-Hs 359 TRHGFSSYTDSFVPPSGPSNPMNPTIGN  
PAX7-Hs 354 ARHSFSSYSDSFMNPAAPSNHMPVSN
